# Supplementary material for: Structural and signaling proteins in the Z-disk and their role in cardiomyopathies
Source: Front Physiol. 2023 Mar 2;14:1143858. doi: 10.3389/fphys.2023.1143858 (PMC10017460; doi:10.3389/fphys.2023.1143858)
Supplement: Supplementary file 1 [file DataSheet1.docx]

Supplementary Material

Structural and Signaling Proteins in the Z-disk and their Role in Cardiomyopathies

Maya Noureddine1*, Katja Gehmlich1,2*

1Institute of Cardiovascular Sciences, College of Medical and Dental Sciences, University of Birmingham, Birmingham, United Kingdom

2Cardiovascular Medicine, Radcliffe Department of Medicine and British Heart Foundation Centre of Research Excellence Oxford, University of Oxford, Oxford, United Kingdom

*** Correspondence:**Maya Noureddine
mmn207@student.bham.ac.uk

Katja Gehmlich
k.gehmlich@bham.ac.uk

# Supplementary Tables

The below supplementary tables summarize **missense variants** in Z-disk and Z-disk associated proteins. They show the amino acid and nucleotide changes as well as the associated cardiomyopathies. Data was retrieved from the QIAGEN Human Gene Mutation Database (HGMD, accessed 12/2022). The Minor Allelic Frequency (MAF) of each variant was retrieved from GnomAD (Genome Aggregation Database, accessed 12/2022). Variants with a MAF higher than > 1 x 10−4 are marked in Italics with *.

**Supplementary Table 1: *ACTN2* missense variants reported in different types of cardiomyopathies**

Abbreviations: DCM, dilated cardiomyopathy; HCM, hypertrophic cardiomyopathy; LVNC, left ventricular noncompaction; *variants with a Minor Allele Frequency (MAF) > 1 x 10−4. MAF retrieved from the Genome Aggregation Database (gnomAD).

| **Alpha-actinin 2 Missense Variants** | **Nucleotide Change** | **Disease-associated** | **MAF on GnomAD** | **Pubmed**  **ID** | **Reference** |
| --- | --- | --- | --- | --- | --- |
| **Gln9Arg* | *c.26A>G* | *DCM* | *7.22 x 10-4* | *14567970* | *Mohapatra (2003) Mol Genet Metab 80:207* |
| Met20Val | c.58A>G | HCM | Absent | 27532257 | Walsh (2017) Genet Med 19:192 |
| Phe44Leu | c.130T>C | DCM | Absent | 27532257 | Walsh (2017) Genet Med 19:192 |
| Pro85Ser | c.253C>T | HCM | Absent | 31513939 | Robyns (2020) Eur J Med Genet 63 |
| Met92Val | c.274A>G | HCM | Absent | 27532257 | Walsh (2017) Genet Med 19:192 |
| Arg93Gln | c.278G>A | HCM | 2.83 x 10-5 | 31737537 | Marschall (2019) Cardiovasc Diagn Ther 9:S292 |
| Gly111Val | c.332G>T | HCM | Absent | 17097056 | Theis (2006) Biochem Biophys Res Commun 351:896 |
| Val115Met | c.343G>A | DCM | Absent | 20474083 | Zimmerman (2010) Genet Med 12:268 |
| Ala119Thr | c.355G>A | HCM | Absent | 20022194 | Chiu (2010) J Am Coll Cardiol 55:1127 |
| Ser147Leu | c.440C>T | HCM | 3.98 x 10-6 | 32492895 | Kim (2020) J Clin Med 9: |
| Asn175Tyr | c.523A>T | RCM | Absent | 27662471 | Kostareva (2016) PLoS One 11:e0163362 |
| Leu186Phe | c.556C>T | DCM | 6.36 x 10-5 | 27532257 | Walsh (2017) Genet Med 19:192 |
| Met216Val | c.646A>G | DCM | 2.39 x 10-5 | 31983221 | Mazzarotto (2020) Circulation 141:387 |
| Met228Thr | c.683T>C | HCM | Absent | 25173926 | Girolami (2014) Circ Cardiovasc Genet 7:741 |
| **Asp230Glu* | *c.690T>A* | *HCM* | *1.13 x 10-4* | *27532257* | *Walsh (2017) Genet Med 19:192* |
| Met246Val | c.736A>G | DCM | Absent | 27532257 | Walsh (2017) Genet Med 19:192 |
| Thr247Met | c.740C>T | HCM | Absent | 31680489 | Prondzynski (2019) EMBO Mol Med 11:e11115 |
| **Arg298His* | *c.893G>A* | *LVNC* | *4.46 x 10-4* | *28798025* | *Miszalski-Jamka (2017) Circ Cardiovasc Genet 10:e001763* |
| Arg307Gln | c.920G>A | DCM | 1.41 x 10-5 | 31983221 | Mazzarotto (2020) Circulation 141:387 |
| Leu320Arg | c.959T>G | DCM | 7.95 x 10-6 | 30630173 | Fan (2019) Cytogenet Genome Res 157:148 |
| Asp325Tyr | c.973G>T | HCM | Absent | 33297573 | Micheu (2020) Diagnostics (Basel) 10:1061 |
| Arg327Cys | c.979C>T | HCM | 1.99 x 10-5 | 27532257 | Walsh (2017) Genet Med 19:192 |
| Arg328Gln | c.983G>A | HCM | 1.41 x 10-5 | 28790153 | Burns (2017) Circ Cardiovasc Genet 10:e001666 |
| Pro332Gln | c.995C>A | DCM | 3.98 x 10-6 | 31983221 | Mazzarotto (2020) Circulation 141:387 |
| Lys334Asn | c.1002G>C | LVNC | Absent | 26688388 | Chanavat (2016) Clin Chim Acta 453:80 |
| **Thr347Met* | *c.1040C>T* | *HCM* | *1.34 x 10-4* | *33658040* | *Chung (2021) J Cardiovasc Magn Reson 23:18* |
| Gln349Leu | c.1046A>T | DCM | 1.06 x 10-5 | 24082139 | Gonzalez-Garay (2013) Proc Natl Acad Sci U S A 110:16957 |
| Arg353Trp | c.1057C>T | HCM | 1.59 x 10-5 | 27532257 | Walsh (2017) Genet Med 19:192 |
| Glu387Gln | c.1159G>C | HCM | Absent | 30847666 | Lint (2019) Neth Heart J 27:304 |
| Arg398His | c.1193G>A | HCM | 1.19 x 10-5 | 28790153 | Burns (2017) Circ Cardiovasc Genet 10:e001666 |
| Ala432Val | c.1295C>T | DCM | 4.25 x 10-5 | 31983221 | Mazzarotto (2020) Circulation 141:387 |
| Thr435Thr | c.1305A>C | DCM | Absent | 32746448 | Burstein (2021) Pediatr Res 89:1470 |
| Glu436Ala | c.1307A>C | DCM | 1.59 x 10-5 | 31983221 | Mazzarotto (2020) Circulation 141:387 |
| Glu448Ala | c.1343A>C | HCM | Absent | 33658040 | Chung (2021) J Cardiovasc Magn Reson 23:18 |
| Glu448Lys | c.1342G>A | HCM | 3.98 x 10-6 | 30165862 | Lu (2018) J Transl Med 16:241 |
| Arg457Cys | c.1369C>T | HCM | 7.97 x 10-6 | 28790153 | Burns (2017) Circ Cardiovasc Genet 10:e001666 |
| Gln460Arg | c.1379A>G | HCM | Absent | 31737537 | Marschall (2019) Cardiovasc Diagn Ther 9:S292 |
| Ala462Ser | c.1384G>T | DCM | 7.98 x 10-6 | 24503780 | Pugh (2014) Genet Med 16:601 |
| Leu471Val | c.1411C>G | LVNC | Absent | 33500567 | Mazzarotto (2021) Genet Med 23:856 |
| Tyr473Cys | c.1418A>G | ACM | Absent | 31956495 | Good (2020) HeartRhythm Case Rep 6:15 |
| **Thr495Met* | *c.1484C>T* | *HCM* | *2.76 x 10-4* | *17097056* | *Theis (2006) Biochem Biophys Res Commun 351:896* |
| His518Tyr | c.1552C>T | DCM | 5.57 x 10-5 | 31983221 | Mazzarotto (2020) Circulation 141:387 |
| Ile544Leu | c.1630A>C | HCM | 3.98 x 10-6 | 31534214 | Lahrouchi (2020) Eur J Hum Genet 28:17 |
| Arg572Trp | c.1714C>T | HCM | 5.66 x 10-5 | 27532257 | Walsh (2017) Genet Med 19:192 |
| Glu583Ala | c.1748A>C | HCM | 2.39 x 10-5 | 20022194 | Chiu (2010) J Am Coll Cardiol 55:1127 |
| Ile591Val | c.1771A>G | HCM | 3.98 x 10-6 | 27532257 | Walsh (2017) Genet Med 19:192 |
| **Asp622Asn* | *c.1864G>A* | *HCM* | *2.90 x 10-4* | *31737537* | *Marschall (2019) Cardiovasc Diagn Ther 9:S292* |
| Glu628Gly | c.1883A>G | HCM | Absent | 20022194 | Chiu (2010) J Am Coll Cardiol 55:1127 |
| Glu636Gly | c.1907A>G | DCM | Absent | 32880476 | Verdonschot (2020) Circ Genom Precis Med 13:476 |
| Ile653Thr | c.1958T>C | HCM | Absent | 27532257 | Walsh (2017) Genet Med 19:192 |
| Thr668Arg | c.2003C>G | DCM | 5.17 x 10-5 | 27532257 | Walsh (2017) Genet Med 19:192 |
| Ala705Thr | c.2113G>A | DCM | Absent | 28123168 | Higashi (2017) Circ J 81:895 |
| Ala732Thr | c.2194G>A | DCM | 3.18 x 10-5 | 32826072 | Peña-Peña (2021) Med Clin (Barc) 156:485 |
| Arg759Thr | c.2276G>C | HCM | Absent | 17097056 | Theis (2006) Biochem Biophys Res Commun 351:896 |
| Asn763Lys | c.2289C>G | DCM | 3.98 x 10-6 | 27532257 | Walsh (2017) Genet Med 19:192 |
| His775Tyr | c.2323C>T | DCM | 1.19 x 10-5 | 20474083 | Zimmerman (2010) Genet Med 12:268 |
| Arg796Cys | c.2386C>T | HCM | 1.77 x 10-5 | 27532257 | Walsh (2017) Genet Med 19:192 |
| Asp826Asn | c.2476G>A | DCM | 7.96 x 10-6 | 31983221 | Mazzarotto (2020) Circulation 141:387 |
| Glu849Gly | c.2546A>G | DCM | Absent | 32746448 | Burstein (2021) Pediatr Res 89:1470 PubMed |
| Arg851His | c.2552G>A | DCM | 4.06 x 10-5 | 31983221 | Mazzarotto (2020) Circulation 141:387 |
| Arg852Gln | c.2555G>A | HCM | 7.08 x 10-5 | 28640247 | Ko (2018) Genet Med 20:69 |
| Asp857His | c.2569G>C | HCM | 2.39 x 10-5 | 26573135 | Xu (2015) Sci Rep 5:16609 |
| Gly877Cys | c.2629G>T | DCM | 1.99 x 10-5 | 31737537 | Marschall (2019) Cardiovasc Diagn Ther 9:S292 |
| Asp893Gly | c.2678A>G | HCM | 2.12 x 10-5 | 32746448 | Burstein (2021) Pediatr Res 89:1470 |

**Supplementary Table 2: *FLNC* missense variants reported in different types of cardiomyopathies**

Abbreviations: DCM, dilated cardiomyopathy; HCM, hypertrophic cardiomyopathy; LVNC, left ventricular noncompaction; RCM, restrictive cardiomyopathy; ACM, arrhythmogenic cardiomyopathy. *variants with a Minor Allele Frequency (MAF) > 1 x 10−4. MAF retrieved from the Genome Aggregation Database (gnomAD).

| **Filamin C Missense Variants** | **Nucleotide Change** | **Disease-associated** | **MAF on GnomAD** | **Pubmed ID** | **Reference** |
| --- | --- | --- | --- | --- | --- |
| Phe106Leu | c.318C>G | DCM | 5.04 x 10-5 | 27601210 | Reinstein (2016) Eur J Hum Genet 24:1792 |
| Glu110Lys | c.328G>A | DCM | Absent | 32112656 | Verdonschot (2020) Hum Mutat 41:1091 |
| Val123Ala | c.368T>C | HCM | Absent | 25351925 | Valdés-Mas (2014) Nat Commun 5:5326 |
| Val123Met | c.367G>A | DCM | 4.02 x 10-6 | 32112656 | Verdonschot (2020) Hum Mutat 41:1091 |
| Asp150Gly | c.449A>G | ACM | 3.59 x 10-5 | 32112656 | Verdonschot (2020) Hum Mutat 41:1091 |
| Arg164Trp | c.490C>T | LVNC | 4.01 x 10-6 | 31918855 | Liu (2020) Int J Cardiol 302:117 |
| Ala199Pro | c.595G>C | ACM | Absent | 34601126 | Celeghin (2022) Heart Rhythm 19:235 |
| His248Leu | c.743A>T | HCM | Absent | 32112656 | Verdonschot (2020) Hum Mutat 41:1091 |
| Asn290Lys | c.870C>A | HCM | Absent | 25351925 | Valdés-Mas (2014) Nat Commun 5:5326 |
| Asn329Ser | c.986A>G | HCM | 1.20 x 10-5 | 28138913 | Restrepo-Cordoba (2017) J Cardiovasc Transl Res 10:35 |
| Ile359Thr | c.1076T>C | HCM | Absent | 30411535 | Cui (2018) Mol Genet Genomic Med 6:1104 |
| Val378Leu | c.1132G>T | HCM | Absent | 30411535 | Cui (2018) Mol Genet Genomic Med 6:1104 |
| Ala427Thr | c.1279G>A | HCM | Absent | 30418145 | Ader (2018) Med Sci (Paris) :39 |
| Arg441Ile | c.1322G>T | DCM | Absent | 32154132 | Xiao (2020) Transl Pediatr 9:21 |
| Pro458Arg | c.1373C>G | ACM | Absent | 34601126 | Celeghin (2022) Heart Rhythm 19:235 |
| Asn475Lys | c.1425C>A | HCM | Absent | 32112656 | Verdonschot (2020) Hum Mutat 41:1091 |
| **Lys492Glu* | *c.1474A>G* | *DCM* | *2.60 x 10-4* | *30847666* | *Van Lint (2019) Neth Heart J 27:304* |
| Val628Met | c.1882G>A | HCM | Absent | 30411535 | Cui (2018) Mol Genet Genomic Med 6:1104 |
| Val684Leu | c.2050G>C | HCM | 1.60 x 10-5 | 30411535 | Cui (2018) Mol Genet Genomic Med 6:1104 |
| Arg695His | c.2084G>A | HCM | 1.60 x 10-5 | 32112656 | Verdonschot (2020) Hum Mutat 41:1091 |
| Pro713Ala | c.2137C>G | ACM | 4.02 x 10-6 | 34601126 | Celeghin (2022) Heart Rhythm 19:235 |
| Ile714Thr | c.2141T>C | ACM | 3.19 x 10-5 | 31627847 | Hall (2019) Int J Cardiol 307:101 |
| Gly724Ser | c.2170G>A | HCM | 4.06 x 10-6 | 30411535 | Cui (2018) Mol Genet Genomic Med 6:1104 |
| Ser792Ile | c.2375G>T | HCM | 6.34 x 10-6 | 27574918 | Jaafar (2016) Genet Test Mol Biomarkers 20:674 |
| Val809Met | c.2425G>A | DCM | 1.78 x 10-5 | 28436997 | Janin (2017) Clin Genet 92:616 |
| Ile817Thr | c.2450T>C | HCM | 2.50 x 10-5 | 29030401 | Cirino (2017) Circ Cardiovasc Genet 10:e001768 |
| Pro863Ser | c.2587C>T | HCM | 4.15 x 10-6 | 30411535 | Cui (2018) Mol Genet Genomic Med 6:1104 |
| Glu913Lys | c.2737G>A | HCM | 1.21 x 10-5 | 30411535 | Cui (2018) Mol Genet Genomic Med 6:1104 |
| Tyr1042Cys | c.3125A>G | DCM | 3.18 x 10-5 | 31931689 | Ramchand (2020) J Am Heart Assoc 9:e013346 |
| Arg1159Trp | c.3475C>T | HCM | 1.78 x 10-5 | 30418145 | Ader (2018) Med Sci (Paris) :39 |
| Arg1167Cys | c.3499C>T | HCM | 2.01 x 10-5 | 31513939 | Robyns (2020) Eur J Med Genet 63 |
| Ala1186Val | c.3557C>T | RCM | Absent | 29858533 | Kiselev (2018) Hum Mutat 39:9 |
| Ser1194Leu | c.3581C>T | HCM | 4.01 x 10-6 | 30418145 | Ader (2018) Med Sci (Paris) :39 |
| Ala1208Val | c.3623C>T | HCM | 9.61 x 10-5 | 30411535 | Cui (2018) Mol Genet Genomic Med 6:1104 |
| Thr1227Ile | c.3680C>T | HCM | 3.21 x 10-5 | 30418145 | Ader (2018) Med Sci (Paris) :39 |
| Lys1398Glu | c.4192A>G | DCM | Absent | 32659924 | Kolokotronis (2020) J Clin Med 9: |
| Gly1424Val | c.4271G>T | HCM | Absent | 30418145 | Ader (2018) Med Sci (Paris) :39 |
| Tyr1519Cys | c.4556A>G | DCM | 4.30 x 10-6 | 32746448 | Burstein (2021) Pediatr Res 89:1470 |
| Ala1539Thr | c.4615G>A | HCM | Absent | 25351925 | Valdés-Mas (2014) Nat Commun 5:5326 |
| **Arg1567Gln* | *c.4700G>A* | *DCM* | *7.42 x 10-2* | *28296976* | *Esslinger (2017) PLoS One 12:e0172995* |
| Gly1570Cys | c.4708G>T | HCM | Absent | 31513939 | Robyns (2020) Eur J Med Genet 63: |
| Thr1575Ser | c.4724C>G | ACM | 1.61 x 10-5 | 34601126 | Celeghin (2022) Heart Rhythm 19:235 |
| Thr1599Ala | c.4795A>G | HCM | 4.02 x 10-6 | 28356264 | Gómez (2017) Circ Cardiovasc Genet 10:e001584 |
| Ser1624Leu | c.4871C>T | RCM | 3.19 x 10-5 | 26666891 | Brodehl (2016) Hum Mutat 37:269 |
| Cys1639Tyr | c.4916G>A | RCM | Absent | 32154132 | Xiao (2020) Transl Pediatr 9:21 |
| Thr1664Met | c.4991C>T | LVNC | Absent | 31918855 | Liu (2020) Int J Cardiol 302:117 |
| Ile1666Thr | c.4997T>C | LVNC | Absent | 30418145 | Ader (2018) Med Sci (Paris) :39 |
| Thr1679Lys | c.5036C>A | DCM | 4.01 x 10-6 | 32112656 | Verdonschot (2020) Hum Mutat 41:1091 |
| Thr1681Met | c.5042C>T | HCM | 3.92 x 10-5 | 28356264 | Gómez (2017) Circ Cardiovasc Genet 10:e001584 |
| Leu1690Phe | c.5068C>T | HCM | Absent | 28356264 | Gómez (2017) Circ Cardiovasc Genet 10:e001584 |
| Pro1709Ser | c.5125C>T | HCM | Absent | 30411535 | Cui (2018) Mol Genet Genomic Med 6:1104 |
| Pro1711Leu | c.5132C>T | HCM | 8.02 x 10-6 | 30411535 | Cui (2018) Mol Genet Genomic Med 6:1104 |
| Trp1766Arg | c.5296T>C | HCM | 6.89 x 10-5 | 31513939 | Robyns (2020) Eur J Med Genet 63: |
| Ile1882Val | c.5644A>G | ACM | Absent | 31627847 | Hall (2019) Int J Cardiol 307:101 |
| Arg1931Cys | c.5791C>T | DCM | 4.60 x 10-5 | 32112656 | Verdonschot (2020) Hum Mutat 41:1091 |
| Ile1937Asn | c.5810T>A | HCM | Absent | 33673806 | Hathaway (2021) BMC Cardiovasc Disord 21:126 |
| Thr1963Met | c.5888C>T | HCM | 3.21 x 10-5 | 30411535 | Cui (2018) Mol Genet Genomic Med 6:1104 |
| Ala1979Thr | c.5935G>A | HCM | 1.43 x 10-5 | 33455984 | Qin (2021) Int Heart J 62:127 |
| **Ser1985Leu* | *c.5954C>T* | *HCM* | *2.00 x 10-4* | *32112656* | *Verdonschot (2020) Hum Mutat 41:1091* |
| Arg1999Gln | c.5996G>A | HCM | 1.61 x 10-5 | 27574918 | Jaafar (2016) Genet Test Mol Biomarkers 20:674 |
| Gly2011Arg | c.6031G>A | DCM | Absent | 32659924 | Kolokotronis (2020) J Clin Med 9: |
| Gly2011Glu | c.6032G>A | HCM | Absent | 30418145 | Ader (2018) Med Sci (Paris) :39 |
| Arg2018His | c.6053G>A | HCM | 2.81 x 10-5 | 26688388 | Chanavat (2016) Clin Chim Acta 453:80 |
| Gly2034Arg | c.6100G>C | DCM | Absent | 32112656 | Verdonschot (2020) Hum Mutat 41:1091 |
| Gly2039Arg | c.6115G>A | HCM | 7.12 x 10-6 | 30418145 | Ader (2018) Med Sci (Paris) :39 |
| Arg2045Gln | c.6134G>A | HCM | 4.28 x 10-5 | 26688388 | Chanavat (2016) Clin Chim Acta 453:80 |
| Gln2058Arg | c.6173A>G | ACM | Absent | 31627847 | Hall (2019) Int J Cardiol 307:101 |
| Ala2069Thr | c.6205G>A | HCM | Absent | 32112656 | Verdonschot (2020) Hum Mutat 41:1091 |
| Gly2070Ser | c.6208G>A | DCM, ACM | Absent | 27908349 | Ortiz-Genga (2016) J Am Coll Cardiol 68:2440 |
| Gly2080Arg | c.6238G>C | HCM | Absent | 32037394 | Reuter (2020) Genet Med 22:1015 |
| Ile2109Val | c.6325A>G | ACM | 2.00 x 10-5 | 34601126 | Celeghin (2022) Heart Rhythm 19:235 |
| Arg2133Cys | c.6397C>T | HCM | Absent | 30411535 | Cui (2018) Mol Genet Genomic Med 6:1104 |
| Arg2133His | c.6398G>A | HCM | Absent | 25351925 | Valdés-Mas (2014) Nat Commun 5:5326 |
| Arg2140Gln | c.6419G>A | HCM | 2.01 x 10-5 | 28356264 | Gómez (2017) Circ Cardiovasc Genet 10:e001584 |
| Gly2151Ser | c.6451G>A | HCM | Absent | 25351925 | Valdés-Mas (2014) Nat Commun 5:5326 |
| Ile2160Phe | c.6478A>T | RCM | Absent | 26666891 | Brodehl (2016) Hum Mutat 37:269 |
| Arg2173His | c.6518G>A | DCM | Absent | 32112656 | Verdonschot (2020) Hum Mutat 41:1091 |
| Arg2180Cys | c.6538C>T | ACM | 2.84 x 10-5 | 32112656 | Verdonschot (2020) Hum Mutat 41:1091 |
| Arg2187Cys | c.6559C>T | ACM | 8.09 x 10-6 | 32112656 | Verdonschot (2020) Hum Mutat 41:1091 |
| Arg2197Trp | c.6589C>T | HCM | Absent | 28138913 | Restrepo-Cordoba (2017) J Cardiovasc Transl Res 10:35 |
| Lys2260Arg | c.6779A>G | ACM | 4.11 x 10-5 | 31627847 | Hall (2019) Int J Cardiol 307:101 |
| Ala2264Thr | c.6790G>A | DCM | 1.07 x 10-5 | 32112656 | Verdonschot (2020) Hum Mutat 41:1091 |
| Thr2287Lys | c.6860C>A | HCM | Absent | 32112656 | Verdonschot (2020) Hum Mutat 41:1091 |
| Arg2293Cys | c.6877C>T | DCM | 1.07 x 10-5 | 32112656 | Verdonschot (2020) Hum Mutat 41:1091 |
| Gly2294Asp | c.6881G>A | DCM | 4.25 x 10-6 | 33726816 | Stranneheim (2021) Genome Med 13:40 |
| Val2297Met | c.6889G>A | RCM | 4.22 x 10-6 | 29212899 | Tucker (2017) Circ Cardiovasc Genet 10:e001780 |
| Pro2298Leu | c.6893C>T | RCM | Absent | 30260051 | Schubert (2018) Hum Mutat 39:2083 |
| Pro2298Ser | c.6892C>T | HCM | Absent | 28356264 | Gómez (2017) Circ Cardiovasc Genet 10:e001584 |
| Gly2299Ser | c.6895G>A | HCM | Absent | 30418145 | Ader (2018) Med Sci (Paris) :39 |
| Pro2301Ala | c.6901C>G | HCM | Absent | 28356264 | Gómez (2017) Circ Cardiovasc Genet 10:e001584 |
| Pro2301Leu | c.6902C>T | RCM | Absent | 30919686 | Roldán-Sevilla (2019) Circ Genom Precis Med 12:e002388 |
| Pro2308Leu | c.6923C>T | HCM | 4.14 x 10-5 | 30418145 | Ader (2018) Med Sci (Paris) :39 |
| His2315Asn | c.6943C>A | HCM | Absent | 25351925 | Valdés-Mas (2014) Nat Commun 5:5326 |
| Lys2316Arg | c.6947A>G | HCM | Absent | 31513939 | Robyns (2020) Eur J Med Genet 63: |
| Arg2318Trp | c.6952C>T | HCM | 8.19 x 10-6 | 28356264 | Gómez (2017) Circ Cardiovasc Genet 10:e001584 |
| Ala2344Thr | c.7030G>A | HCM | 8.02 x 10-6 | 30411535 | Cui (2018) Mol Genet Genomic Med 6:1104 |
| Ile2359Thr | c.7076T>C | HCM | Absent | 30418145 | Ader (2018) Med Sci (Paris) :39 |
| Val2375Leu | c.7123G>C | HCM | Absent | 30418145 | Ader (2018) Med Sci (Paris) :39 |
| Val2375Phe | c.7123G>T | HCM | Absent | 28356264 | Gómez (2017) Circ Cardiovasc Genet 10:e001584 |
| Arg2410Cys | c.7228C>T | HCM | 2.41 x 10-5 | 30418145 | Ader (2018) Med Sci (Paris) :39 |
| Gln2417Pro | c.7250A>C | HCM | Absent | 30418145 | Ader (2018) Med Sci (Paris) :39 |
| Leu2421His | c.7262T>A | HCM | Absent | 31006259 | Norrish (2019) Circulation 140:184 |
| **Ala2430Val* | *c.7289C>T* | *HCM* | *1.01 x 10-4* | *25351925* | *Valdés-Mas (2014) Nat Commun 5:5326* |
| His2476Arg | c.7427A>G | HCM | Absent | 31513939 | Robyns (2020) Eur J Med Genet 63: |
| Gly2484Ser | c.7450G>A | DCM | 2.80 x 10-5 | 32112656 | Verdonschot (2020) Hum Mutat 41:1091 |
| Arg2495His | c.7484G>A | HCM | 4.01 x 10-6 | 30418145 | Ader (2018) Med Sci (Paris) :39 |
| Pro2505Leu | c.7514C>T | HCM | Absent | 30411535 | Cui (2018) Mol Genet Genomic Med 6:1104 |
| Asp2551Gly | c.7652A>G | DCM | 8.03 x 10-6 | 32112656 | Verdonschot (2020) Hum Mutat 41:1091 |
| Tyr2563Cys | c.7688A>G | RCM | Absent | 30260051 | Schubert (2018) Hum Mutat 39:2083 |
| Gly2594Ala | c.7781G>C | HCM | Absent | 26688388 | Chanavat (2016) Clin Chim Acta 453:80 |
| Ser2618Phe | c.7853C>T | HCM | Absent | 32112656 | Verdonschot (2020) Hum Mutat 41:1091 |

**Supplementary Table 3: *TTN* missense variants in the Z-disk region (first 900 amino acids) reported in different types of cardiomyopathies**

Abbreviations: DCM, dilated cardiomyopathy; HCM, hypertrophic cardiomyopathy; LVNC, left ventricular noncompaction. *variants with a Minor Allele Frequency (MAF) > 1 x 10−4. MAF retrieved from the Genome Aggregation Database (gnomAD).

| **Titin Missense Variants** | **Nucleotide Change** | **Disease-associated** | **MAF on GnomAD** | **Pubmed ID** | **Reference** |
| --- | --- | --- | --- | --- | --- |
| Pro6Leu | c.17C>T | DCM | 1.20 x 10-5 | 31983221 | Mazzarotto (2020) Circulation 141:387 |
| Val17Leu | c.49G>T | HCM | Absent | Absent | Micheu (2022) Romanian Journal of Cardiology 31:3 |
| Gly43Ala | c.128G>C | DCM | Absent | 31983221 | Mazzarotto (2020) Circulation 141:387 |
| Val45Leu | c.133G>C | DCM | 2.83 x 10-5 | 31983221 | Mazzarotto (2020) Circulation 141:387 |
| Val54Met | c.160G>A | DCM | 4.25 x 10-5 | 11846417 | Itoh-Satoh (2002) Biochem Biophys Res Commun 291:385 |
| Asp60Asn | c.178G>A | DCM | 1.59 x 10-5 | 31983221 | Mazzarotto (2020) Circulation 141:387 |
| Ala178Asp | c.533C>A | DCM, LVNC | Absent | 27625337 | Hastings (2016) Circ Cardiovasc Genet 9:426 |
| Arg220Gln | c.659G>A | LVNC | 1.42 x 10-5 | 30847666 | van Lint (2019) Neth Heart J 27:304 |
| Thr253Ile | c.758C>T | HCM | Absent | 28771489 | Mademont-Soler (2017) PLoS One 12:e0181465 |
| Ser306Pro | c.916T>C | DCM | Absent | 31983221 | Mazzarotto (2020) Circulation 141:387 |
| Thr334Ala | c.1000A>G | DCM | 3.98 x 10-6 | 31983221 | Mazzarotto (2020) Circulation 141:387 |
| Ile443Met | c.1329C>G | DCM | 3.18 x 10-5 | 31983221 | Mazzarotto (2020) Circulation 141:387 |
| Ala450Val | c.1349C>T | DCM | 3.98 x 10-6 | 32746448 | Burstein (2021) Pediatr Res 89:1470 |
| Gln547Arg | c.1640A>G | DCM | 6.75 x 10-5 | 31983221 | Mazzarotto (2020) Circulation 141:387 |
| Gly721Arg | c.2161G>A | DCM | Absent | 31983221 | Mazzarotto (2020) Circulation 141:387 |
| Arg740Leu | c.2219G>T | HCM | Absent | 10462489 | Satoh (1999) Biochem Biophys Res Commun 262:411 |
| Ala743Val | c.2228C>T | DCM | Absent | 11846417 | Itoh-Satoh (2002) Biochem Biophys Res Commun 291:385 |
| **Gln770His* | *c.2310G>T* | *DCM* | *1.10 x 10-4* | *31983221* | *Mazzarotto (2020) Circulation 141:387* |
| His786Gln | c.2358C>G | DCM | 7.44 x 10-5 | 31983221 | Mazzarotto (2020) Circulation 141:387 |
| Ala840Ser | c.2518G>T | HCM | Absent | Absent | Micheu (2022) Romanian Journal of Cardiology 31:3 |
| Thr863Ala | c.2587A>G | DCM | 3.98 x 10-6 | 31983221 | Mazzarotto (2020) Circulation 141:387 |

**Supplementary Table 4: *CSPR3* missense variants reported in different types of cardiomyopathies**

Abbreviations: DCM, dilated cardiomyopathy; HCM, hypertrophic cardiomyopathy. *variants with a Minor Allele Frequency (MAF) > 1 x 10−4. MAF retrieved from the Genome Aggregation Database (gnomAD).

| ***CSPR3***  **Missense Variants** | **Nucleotide Change** | **Disease-associated** | **MAF on GnomAD** | **Pubmed ID** | **Reference** |
| --- | --- | --- | --- | --- | --- |
| Met1Thr | c.2T>C | DCM | Absent | 29886034 | Shakeel (2018) Gene 673:134 |
| Asn3Lys | c.9C>G | DCM | Absent | 32880476 | Verdonschot (2020) Circ Genom Precis Med 13:476 |
| **Trp4Arg* | *c.10T>C* | *DCM* | *2.28 x 10-3* | *12507422* | *Knoll (2002) Cell 111:943* |
| **Gly6Arg* | *c.16G>A* | *DCM* | *1.06 x 10-4* | *31983221* | *Mazzarotto (2020) Circulation 141:387* |
| Thr16Ser | c.46A>T | DCM | Absent | 31919335 | Lipari (2020) Pol Arch Intern Med 130:89 |
| His31Gln | c.93C>G | HCM | Absent | 28790153 | Burns (2017) Circ Cardiovasc Genet 10:e001666 |
| Lys32Lys | c.96G>A | DCM | Absent | 31919335 | Lipari (2020) Pol Arch Intern Med 130:89 |
| His36Tyr | c.106C>T | DCM | Absent | 31983221 | Mazzarotto (2020) Circulation 141:387 |
| Leu44Pro | c.131T>C | HCM | 1.42 x 10-5 | 12642359 | Geier (2003) Circulation 107:1390 |
| Ser46Arg | c.136A>C | HCM | 2.83 x 10-5 | 18505755 | Geier (2008) Hum Mol Genet 17:2753 |
| Thr47Met | c.140C>T | HCM | 2.39 x 10-5 | 27532257 | Walsh (2017) Genet Med 19:192 |
| Ala50Thr | c.148G>A | DCM | 3.90 x 10-5 | 20474083 | Zimmerman (2010) Genet Med 12:268 |
| Ala51Asp | c.152C>A | HCM | 2.39 x 10-5 | 27532257 | Walsh (2017) Genet Med 19:192 |
| Ser54Leu | c.161C>T | HCM | 1.19 x 10-5 | 30847666 | van Lint (2019) Neth Heart J 27:304 |
| Tyr57Ser | c.170A>C | HCM | Absent | 22429680 | Santos (2012) BMC Med Genet 13:17 |
| Cys58Gly | c.172T>G | HCM | Absent | 12642359 | Geier (2003) Circulation 107:1390 |
| Arg64Cys | c.190C>T | HCM | 3.89 x 10-5 | 16352453 | Bos (2006) Mol Genet Metab 88:78 |
| Arg64His | c.191G>A | HCM | 2.12 x 10-5 | 27532257 | Walsh (2017) Genet Med 19:192 |
| Arg64Leu | c.191G>T | HCM | Absent | 31513939 | Robyns (2020) Eur J Med Genet 63: |
| Tyr66Cys | c.197A>G | HCM | 7.96 x 10-6 | 16352453 | Bos (2006) Mol Genet Metab 88:78 |
| Lys69Arg | c.206A>G | DCM | 1.99 x 10-5 | 14567970 | Mohapatra (2003) Mol Genet Metab 80:207 |
| Gly70Trp | c.208G>T | HCM | 3.58 x 10-5 | 33297573 | Micheu (2020) Diagnostics (Basel) 10: |
| Arg70Trp | C.208C>T | HCM | Absent | 16352453 | Bos (2006) Mol Genet Metab 88:78 |
| Gly72Arg | c.214G>A | DCM | 2.48 x 10-5 | 19412328 | Hershberger (2008) Clin Transl Sci 1:21 |
| Gly78Val | c.233G>T | DCM | Absent | 31919335 | Lipari (2020) Pol Arch Intern Med 130:89 |
| Thr84Met | c.251C>T | HCM | 1.19 x 10-5 | 31006259 | Norrish (2019) Circulation 140:184 |
| Gly89Cys | c.265G>T | DCM | 1.77 x 10-5 | 32880476 | Verdonschot (2020) Circ Genom Precis Med 13:476 |
| Gln91Glu | c.271C>G | HCM | 3.99 x 10-6 | 32815737 | Pua (2020) Circ Genom Precis Med 13:424 |
| Gln91Leu | c.272A>T | HCM | 1.42 x 10-5 | 16352453 | Bos (2006) Mol Genet Metab 88:78 |
| **Arg100His* | *c.299G>A* | *HCM* | *1.32 x 10-3* | *19035361* | *Andersen (2009) Hum Mutat 30:363* |
| Gly115Glu | c.344G>A | HCM | 7.96 x 10-6 | 30847666 | Lint (2019) Neth Heart J 27:304 |
| Glu118Glu | c.354G>A | DCM | Absent | 31919335 | Lipari (2020) Pol Arch Intern Med 130:89 |
| Val127Ile | c.379G>A | HCM | 3.58 x 10-5 | 27532257 | Walsh (2017) Genet Med 19:192 |
| Trp140Cys | c.420G>C | DCM | Absent | 31919335 | Lipari (2020) Pol Arch Intern Med 130:89 |
| Arg146Cys | c.436C>T | HCM | 1.19 x 10-5 | 28790153 | Burns (2017) Circ Cardiovasc Genet 10:e001666 |
| Arg146His | c.437G>A | HCM | 1.99 x 10-5 | 28790153 | Burns (2017) Circ Cardiovasc Genet 10:e001666 |
| Cys150Tyr | c.449G>A | HCM | 3.98 x 10-6 | 33035702 | Salazar-Mendiguchía (2020) Eur J Med Genet 63: |
| Asn158Asp | c.472A>G | HCM | 7.95 x 10-6 | 30847666 | Van Lint (2019) Neth Heart J 27:304 |
| Cys171Gly | c.511T>G | HCM | 3.98 x 10-6 | 28790153 | Burns (2017) Circ Cardiovasc Genet 10:e001666 |
| Tyr172His | c.514T>C | HCM | Absent | 30847666 | van Lint (2019) Neth Heart J 27:304 |
| Thr179Ala | c.535A>G | DCM | 1.41 x 10-5 | 27532257 | Walsh (2017) Genet Med 19:192 |
| Val190Leu | c.568G>T | HCM | 4.60 x 10-5 | 31737537 | Marschall (2019) Cardiovasc Diagn Ther 9:S292 |

**Supplementary Table 5: *TCAP* missense variants reported in different types of cardiomyopathies**

Abbreviations: DCM, dilated cardiomyopathy; HCM, hypertrophic cardiomyopathy. *variants with a Minor Allele Frequency (MAF) > 1 x 10−4. MAF retrieved from the Genome Aggregation Database (gnomAD).

| **Telethonin Missense Variants** | **Nucleotide Change** | **Disease-associated** | **MAF on GnomAD** | **Pubmed ID** | **Reference** |
| --- | --- | --- | --- | --- | --- |
| Arg18Gln | c.53G>A | DCM | 2.39 x 10-5 | 19412328 | Hershberger (2008) Clin Transl Sci 1:21 |
| Arg18Trp | c.52C>T | DCM | 1.59 x 10-5 | 31983221 | Mazzarotto (2020) Circulation 141:387 |
| Ala23Glu | c.68C>A | HCM | Absent | 33297573 | Micheu (2020) Diagnostics (Basel) 10:1061 |
| Glu49Lys | c.145G>A | DCM | 3.70 x 10-5 | 19412328 | Hershberger (2008) Clin Transl Sci 1:21 |
| Cys57Trp | c.171C>G | HCM | 1.66 x 10-5 | 32565061 | Toste (2020) Rev Port Cardiol 39:317 |
| Arg70Trp | c.208C>T | HCM | 4.62 x 10-5 | 16352453 | Bos (2006) Mol Genet Metab 88:78 |
| Arg87Gln | c.260G>A | DCM | 4.12 x 10-6 | 12507422 | Knoll (2002) Cell 111:943 |
| Pro90Leu | c.269C>T | HCM | 4.10 x 10-6 | 16352453 | Bos (2006) Mol Genet Metab 88:78 |
| **Glu105Gln* | *c.313G>C* | *DCM* | *5.10 x 10-4* | *30871747* | *Sousa (2019) Rev Port Cardiol 38:129* |
| **Arg106Cys* | *c.316C>T* | *HCM* | *2.19 x 10-2* | *19035361* | *Andersen (2009) Hum Mutat 30:363* |
| Arg130Cys | c.388C>T | DCM | 5.69 x 10-5 | 27532257 | Walsh (2017) Genet Med 19:192 |
| Glu132Gln | c.394G>C | DCM | 4.01 x 10-6 | 15582318 | Hayashi (2004) J Am Coll Cardiol 44:2192 |
| Thr137Ile | c.410C>T | HCM | Absent | 15582318 | Hayashi (2004) J Am Coll Cardiol 44:2192 |
| Pro142Arg | c.425C>G | HCM | 4.04 x 10-6 | 33658040 | Chung (2021) J Cardiovasc Magn Reson 23:18 |
| Gly150Ser | c.448G>A | DCM | 5.79 x 10-5 | 31983221 | Mazzarotto (2020) Circulation 141:387 |
| **Arg153His* | *c.458G>A* | *HCM* | *2.37 x 10-4* | *15582318* | *Hayashi (2004) J Am Coll Cardiol 44:2192* |
| Arg158Cys | c.472C>T | DCM | 8.28 x 10-6 | 24037902 | Hirtle-Lewis (2013) Clin Cardiol 36:628 |
| Arg158Ser | c.472C>A | DCM | Absent | 26084686 | Akinrinade (2015) Eur Heart J 36:2327 |
| Gln165Glu | c.493C>G | DCM | Absent | 27532257 | Walsh (2017) Genet Med 19:192 |

**Supplementary Table 6: *MYPN* missense variants reported in different types of cardiomyopathies**

Abbreviations: DCM, dilated cardiomyopathy; HCM, hypertrophic cardiomyopathy; LVNC, left ventricular noncompaction. *variants with a Minor Allele Frequency (MAF) > 1 x 10−4. MAF retrieved from the Genome Aggregation Database (gnomAD).

| **Myopalladin Missense Variants** | **Nucleotide Change** | **Disease-associated** | **MAF on GnomAD** | **Pubmed ID** | **Reference** |
| --- | --- | --- | --- | --- | --- |
| Met1Ile | c.3G>A | DCM | Absent | 29095814 | Hu (2018) Genet Med 20:1045 |
| **Tyr20Cys* | *c.59A>G* | *DCM, HCM* | *9.34 x 10-4* | *22286171* | *Purevjav (2012) Hum Mol Genet 21:2039* |
| **Ala22Gly* | *c.65C>G* | *HCM* | *2.55 x 10-4* | *32746448* | *Burstein (2021) Pediatr Res 89:1470* |
| Pro47Leu | c.140C>T | DCM | 6.72 x 10-5 | 31983221 | Mazzarotto (2020) Circulation 141:387 |
| Arg137Ser | c.411G>C | HCM | 3.89 x 10-5 | 30165862 | Lu (2018) J Transl Med 16:241 |
| Lys153Arg | c.458A>G | HCM | 9.55 x 10-5 | 22286171 | Purevjav (2012) Hum Mol Genet 21:2039 |
| Asp156Glu | c.468C>G | DCM | Absent | 32041989 | Zhang (2020) Sci Rep 10:2226 |
| Ile213Val | c.637A>G | DCM | Absent | 22286171 | Purevjav (2012) Hum Mol Genet 21:2039 |
| Ala217Glu | c.650C>A | HCM | 3.98 x 10-6 | 22286171 | Purevjav (2012) Hum Mol Genet 21:2039 |
| Ala265Pro | c.793G>C | HCM | Absent | 22286171 | Purevjav (2012) Hum Mol Genet 21:2039 |
| Pro269Leu | c.806C>T | DCM | 4.00 x 10-6 | 26383716 | Hazebroek (2015) J Am Coll Cardiol 66:1313 |
| Arg278Gly | c.832A>G | HCM | 3.99 x 10-6 | 30165862 | Lu (2018) J Transl Med 16:241 |
| Arg338Cys | c.1012C>T | HCM | 6.37 x 10-5 | 33297573 | Micheu (2020) Diagnostics (Basel) 10: |
| Tyr339Phe | c.1016A>T | DCM | Absent | 22286171 | Purevjav (2012) Hum Mol Genet 21:2039 |
| Val361Phe | c.1081G>T | HCM | 1.59 x 10-5 | 30847666 | van Lint (2019) Neth Heart J 27:304 |
| Ser366Pro | c.1096T>C | DCM | 2.39 x 10-5 | 31983221 | Mazzarotto (2020) Circulation 141:387 |
| Arg409Cys | c.1225C>T | DCM | 7.96 x 10-6 | 25448463 | Chami (2014) Can J Cardiol 30:1655 |
| **Val410Ala* | *c.1229T>C* | *HCM* | *1.67 x 10-4* | *22286171* | *Purevjav (2012) Hum Mol Genet 21:2039* |
| **Arg489Gln* | *c.1466G>A* | *DCM* | *1.08 x 10-4* | *30847666* | *van Lint (2019) Neth Heart J 27:304* |
| Ala492Val | c.1475C>T | DCM | 5.59 x 10-5 | 31983221 | Mazzarotto (2020) Circulation 141:387 |
| Val532Met | c.1594G>A | LVNC | 2.81 x 10-5 | 28798025 | Miszalski-Jamka (2017) Circ Cardiovasc Genet 10:e001763 |
| Gly542Arg | c.1624G>A | LVNC | 1.06 x 10-5 | 28798025 | Miszalski-Jamka (2017) Circ Cardiovasc Genet 10:e001763 |
| Ala611Thr | c.1831G>A | DCM | Absent | 22286171 | Purevjav (2012) Hum Mol Genet 21:2039 |
| Gln629Pro | c.1886A>C | DCM | Absent | 31983221 | Mazzarotto (2020) Circulation 141:387 |
| Glu630Lys | c.1888G>A | DCM | 7.07 x 10-6 | 26458567 | Zhao (2015) Int J Mol Med 36:1479 |
| Leu677Trp | c.2030T>G | LVNC | Absent | 28798025 | Miszalski-Jamka (2017) Circ Cardiovasc Genet 10:e001763 |
| Pro680Leu | c.2039C>T | DCM | Absent | 31983221 | Mazzarotto (2020) Circulation 141:387 |
| Ser684Cys | c.2051C>G | DCM | 2.39 x 10-5 | 31983221 | Mazzarotto (2020) Circulation 141:387 |
| Pro713Thr | c.2137C>A | DCM | Absent | 30847666 | van Lint (2019) Neth Heart J 27:304 |
| Leu720Trp | c.2159T>G | DCM | 7.95 x 10-6 | 31983221 | Mazzarotto (2020) Circulation 141:387 |
| Thr730Arg | c.2189C>G | HCM | Absent | 31513939 | Robyns (2020) Eur J Med Genet 63: |
| **Pro743Leu* | *c.2228C>T* | *DCM* | *2.51 x 10-4* | *32746448* | *Burstein (2021) Pediatr Res 89:1470* |
| Gln752Glu | c.2254C>G | DCM | Absent | 31737537 | Marschall (2019) Cardiovasc Diagn Ther 9:S292 |
| Val765Ala | c.2294T>C | DCM | 7.96 x 10-6 | 31737537 | Marschall (2019) Cardiovasc Diagn Ther 9:S292 |
| Arg810Cys | c.2428C>T | HCM | 1.99 x 10-5 | 30847666 | van Lint (2019) Neth Heart J 27:304 |
| Pro826Thr | c.2476C>A | HCM | Absent | 30206291 | Inagaki (2018) J Hum Genet 63:1273 |
| Pro835Thr | c.2503C>A | DCM | Absent | 31983221 | Mazzarotto (2020) Circulation 141:387 |
| Pro841Thr | c.2521C>A | HCM | Absent | 22286171 | Purevjav (2012) Hum Mol Genet 21:2039 |
| Ser854Phe | c.2561C>T | HCM | 1.78 x 10-5 | 31737537 | Marschall (2019) Cardiovasc Diagn Ther 9:S292 |
| Asn881Ile | c.2642A>T | DCM | 3.54 x 10-5 | 32880476 | Verdonschot (2020) Circ Genom Precis Med 13:476 |
| Ala882Thr | c.2644G>A | DCM | 1.77 x 10-5 | 22286171 | Purevjav (2012) Hum Mol Genet 21:2039 |
| Glu909Ala | c.2726A>C | DCM | Absent | 32880476 | Verdonschot (2020) Circ Genom Precis Med 13:476 |
| Phe954Leu | c.2862C>A | DCM | Absent | 22286171 | Purevjav (2012) Hum Mol Genet 21:2039 |
| Arg955Gln | c.2864G>A | DCM | 4.60 x 10-5 | 31983221 | Mazzarotto (2020) Circulation 141:387 |
| **Arg955Trp* | *c.2863C>T* | *DCM* | *4.71 x 10-4* | *22892539* | *Meyer (2013) Eur J Hum Genet 21:294* |
| Pro961Leu | c.2882C>T | DCM | Absent | 22892539 | Meyer (2013) Eur J Hum Genet 21:294 |
| Cys1002Trp | c.3006C>G | HCM | Absent | 31513939 | Robyns (2020) Eur J Med Genet 63: |
| **Arg1042Cys* | *c.3124C>T* | *LVNC* | *4.00 x 10-4* | *28798025* | *Miszalski-Jamka (2017) Circ Cardiovasc Genet 10:e001763* |
| Arg1069Cys | c.3205C>T | HCM | 1.19 x 10-5 | 33658040 | Chung (2021) J Cardiovasc Magn Reson 23:18 |
| Arg1088His | c.3263G>A | DCM | 3.98 x 10-6 | 18006477 | Duboscq-Bidot (2008) Cardiovasc Res 77:118 |
| Pro1100Leu | c.3299C>T | HCM | 3.19 x 10-5 | 33658040 | Chung (2021) J Cardiovasc Magn Reson 23:18 |
| **Pro1112Leu* | *c.3335C>T* | *DCM* | *3.06 x 10-3* | *18006477* | *Duboscq-Bidot (2008) Cardiovasc Res 77:118* |
| Ala1148Thr | c.3442G>A | DCM | 1.41 x 10-5 | 25163546 | Haas (2015) Eur Heart J 36:1123 |
| Gly1153Arg | c.3457G>A | LVNC | 1.19 x 10-5 | 30471092 | Richard (2019) Clin Genet 95:356 |
| **Leu1161Ile* | *c.3481C>A* | *HCM* | *3.58 x 10-3* | *22286171* | *Purevjav (2012) Hum Mol Genet 21:2039* |
| Val1195Met | c.3583G>A | DCM | Absent | 18006477 | Duboscq-Bidot (2008) Cardiovasc Res 77:118 |
| Arg1218Ser | c.3654G>C | DCM | 7.97 x 10-6 | 28416588 | Dal Ferro (2017) Heart 103:1704 |
| Gly1253Arg | c.3757G>C | DCM | Absent | 31983221 | Mazzarotto (2020) Circulation 141:387 |
| Val1255Met | c.3763G>A | DCM | 5.57 x 10-5 | 32826072 | Peña-Peña (2021) Med Clin (Barc) 156:485 |
| Ala1259Thr | c.3775G>A | DCM | Absent | 31983221 | Mazzarotto (2020) Circulation 141:387 |
| Ala1265Pro | c.3793G>C | HCM | Absent | 22286171 | Purevjav (2012) Hum Mol Genet 21:2039 |
| Arg1283His | c.3848G>A | HCM | 3.89 x 10-5 | 28427417 | Chen (2017) J Transl Med 15:78 |
| Thr1304Met | c.3911C>T | DCM | 1.77 x 10-5 | 32880476 | Verdonschot (2020) Circ Genom Precis Med 13:476 |
| Met1305Val | c.3913A>G | DCM | 6.01 x 10-5 | 28416588 | Dal Ferro ( 2017) Heart 103:1704 |
| **Arg1312Trp* | *c.3934C>T* | *DCM* | *2.48 x 10-4* | *30847666* | *van Lint (2019) Neth Heart J 27:304* |
| Leu1320Pro | c.3959T>C | LVNC | 7.96 x 10-6 | 28798025 | Miszalski-Jamka (2017) Circ Cardiovasc Genet 10:e001763 |

**Supplementary Table 7: *NEBL* missense variants reported in different types of cardiomyopathies**

Abbreviations: DCM, dilated cardiomyopathy; HCM, hypertrophic cardiomyopathy; LVNC, left ventricular noncompaction. *variants with a Minor Allele Frequency (MAF) > 1 x 10−4. MAF retrieved from the Genome Aggregation Database (gnomAD).

| **Nebulette Missense Variants** | **Nucleotide Change** | **Disease-associated** | **MAF on GnomAD** | **Pubmed ID** | **Reference** |
| --- | --- | --- | --- | --- | --- |
| Val5Ala | c.14T>C | DCM | 6.56 x 10-5 | 32746448 | Burstein (2021) Pediatr Res 89:1470 |
| **Lys60Asn* | *c.180G>C* | *DCM* | *4.00 x 10-3* | *20951326* | *Purevjav (2010) J Am Coll Cardiol 56:1493* |
| Arg104Trp | c.310C>T | DCM | 9.15 x 10-5 | 32746448 | Burstein (2021) Pediatr Res 89:1470 |
| Gln128Arg | c.383A>G | DCM | 2.83 x 10-5 | 20951326 | Purevjav (2010) J Am Coll Cardiol 56:1493 |
| His130Pro | c.389A>C | HCM | Absent | 30165862 | Lu (2018) J Transl Med 16:241 |
| His171Arg | c.512A>G | HCM | 3.98 x 10-6 | 27186169 | Perrot (2016) Arch Med Sci 12:263 |
| Thr172Lys | c.515C>A | DCM | 1.59 x 10-5 | 30165862 | Lu (2018) J Transl Med 16:241 |
| **Ala175Thr* | *c.523G>A* | *DCM* | *1.10 x 10-4* | *27186169* | *Perrot (2016) Arch Med Sci 12:263* |
| **Gln187His* | *c.561G>C* | *HCM* | *1.63 x 10-4* | *32344918* | *Gao (2020) Int J Mol Sci 21:3040* |
| **Gly202Arg* | *c.604G>A* | *DCM* | *2.03 x 10-3* | *20951326* | *Purevjav (2010) J Am Coll Cardiol 56:1493* |
| Ser296Gly | c.886A>G | LVNC | 3.98 x 10-6 | 33500567 | Mazzarotto (2021) Genet Med 23:856 |
| Asn330Ser | c.989A>G | LVNC | Absent | 33500567 | Mazzarotto (2021) Genet Med 23:856 |
| Met351Val | c.1051A>G | DCM | 3.98 x 10-6 | 34302607 | Xiao (2021) Sci China Life Sci : |
| Phe354Leu | c.1060T>C | HCM | 3.98 x 10-6 | 30206291 | Inagaki (2018) J Hum Genet 63:1273 |
| **Asp378His* | *c.1132G>C* | *DCM* | *6.51 x 10-2* | *34302607* | *Xiao (2021) Sci China Life Sci :* |
| Ala477Pro | c.1429G>C | DCM | 2.84 x 10-5 | 30165862 | Lu (2018) J Transl Med 16:241 |
| **Ile480Thr* | *c.1439T>C* | *DCM* | *1.44 x 10-4* | *31737537* | *Marschall (2019) Cardiovasc Diagn Ther 9:S292* |
| Gln581Arg | c.1742A>G | DCM | Absent | 27186169 | Perrot (2016) Arch Med Sci 12:263 |
| **Ala592Glu* | *c.1775C>A* | *DCM* | *3.73 x 10-4* | *20951326* | *Purevjav (2010) J Am Coll Cardiol 56:1493* |
| **Arg613Gln* | *c.1838G>A* | *DCM* | *2.41 x 10-4* | *32746448* | *Burstein (2021) Pediatr Res 89:1470* |
| Ala726Thr | c.2176G>A | LVNC | Absent | 33500567 | Mazzarotto (2021) Genet Med 23:856 |
| Ser747Leu | c.2240C>T | DCM | 8.50 x 10-5 | 27186169 | Perrot (2016) Arch Med Sci 12:263 |
| Gln814Arg | c.2441A>G | DCM | 3.98 x 10-6 | 28416588 | Dal Ferro (2017) Heart 103:1704 |
| Arg845Cys | c.2533C>T | ACM | 4.61 x 10-5 | 30385303 | Chen (2019) Gene 687:82 |
| Ser863Cys | c.2588C>G | LVNC | 1.99 x 10-5 | 33500567 | Mazzarotto (2021) Genet Med 23:856 |
| Pro916Leu | c.2747C>T | LVNC | 6.77 x 10-5 | 27186169 | Perrot (2016) Arch Med Sci |

**Supplementary Table 8: *NEXN* missense variants reported in different types of cardiomyopathies**

Abbreviations: DCM, dilated cardiomyopathy; HCM, hypertrophic cardiomyopathy; LVNC, left ventricular noncompaction. *variants with a Minor Allele Frequency (MAF) > 1 x 10−4. MAF retrieved from the Genome Aggregation Database (gnomAD).

| **Nexilin Missense Variants** | **Nucleotide Change** | **Disease-associated** | **MAF on GnomAD** | **Pubmed ID** | **Reference** |
| --- | --- | --- | --- | --- | --- |
| Ser15Tyr | c.44C>A | HCM | Absent | 33297573 | Micheu (2020) Diagnostics (Basel) 10:1061 |
| Val18Ala | c.53T>C | DCM | 2.41 x 10-5 | 28416588 | Dal Ferro (2017) Heart 103:1704 |
| Glu53Lys | c.157G>A | LVNC | 3.93 x 10-5 | 28798025 | Miszalski-Jamka (2017) Circ Cardiovasc Genet 10:e001763 |
| Ile74Leu | c.220A>C | LVNC | Absent | 33500567 | Mazzarotto (2021) Genet Med 23:856 |
| Glu83Asp | c.249G>C | LVNC | 4.01 x 10-6 | 33500567 | Mazzarotto (2021) Genet Med 23:856 |
| Glu110Gln | c.328G>C | DCM | 1.07 x 10-5 | 25163546 | Hass (2015) Eur Heart J 36:18 |
| Gln131Arg | c.392A>G | HCM | 2.85 x 10-5 | 27532257 | Walsh (2017) Genet Med 19:192 |
| Gln131Glu | c.391C>G | HCM | 4.01 x 10-6 | 20970104 | Wang (2010) Am J Hum Genet 87:687 |
| **Arg196Cys* | *c.586C>T* | *DCM* | *1.07 x 10-4* | *28333919* | *Bagnall (2017) Genet Med 19:1127* |
| Gly157Val | c.470G>T | DCM | Absent | 25163546 | Hass (2015) Eur Heart J 36:18 |
| Arg256Gln | c.767G>A | HCM | 1.20 x 10-5 | 33658040 | Chung (2021) J Cardiovasc Magn Reson 23:18 |
| Lys278Arg | c.833A>G | DCM | Absent | 31983221 | Mazzarotto (2020) Circulation 141:387 |
| **Arg279Cys* | *c.835C>T* | *HCM* | *5.04 x 10-4* | *20970104* | *Wang (2010) Am J Hum Genet 87:687* |
| Arg279Ser | c.835C>A | DCM | 1.61 x 10-5 | 32041989 | Zhang (2020) Sci Rep 10:2226 |
| **Arg286Trp* | *c.856C>T* | *LVNC* | *1.25 x 10-4* | *28798025* | *Miszalski-Jamka (2017) Circ Cardiovasc Genet 10:e001763* |
| Glu291Lys | c.871G>A | HCM | 2.43 x 10-5 | 28790153 | Burns (2017) Circ Cardiovasc Genet 10:e001666 |
| Asp292Asn | c.874G>A | DCM | 4.06 x 10-6 | 30847666 | van Lint (2019) Neth Heart J 27:304 |
| Tyr305Cys | c.914A>G | DCM | 8.10 x 10-6 | 31983221 | Mazzarotto (2020) Circulation 141:387 |
| **Glu332Ala* | *c.995A>C* | *HCM* | *4.07 x 10-3* | *26265630* | *Wilson (2015) Circ Res 117:603* |
| Ala333Thr | c.997G>A | DCM | Absent | 31983221 | Mazzarotto (2020) Circulation 141:387 |
| Asp355His | c.1063G>C | HCM | Absent | 28790153 | Burns (2017) Circ Cardiovasc Genet 10:e001666 |
| Thr363Arg | c.1088C>G | DCM | 3.94 x 10-5 | 25163546 | Hass (2015) Eur Heart J 36:18 |
| Pro371Leu | c.1112C>T | HCM | 6.85 x 10-5 | 27532257 | Walsh (2017) Genet Med 19:192 |
| Lys400Glu | c.1198A>G | DCM | Absent | 31983221 | Mazzarotto (2020) Circulation 141:387 |
| Glu430Asp | c.1290A>C | LVNC | Absent | 31918855 | Liu (2020) Int J Cardiol 302:117 |
| Gly456Arg | c.1366G>A | HCM | 7.13 x 10-6 | 27532257 | Walsh (2017) Genet Med 19:192 |
| Lys466Gln | c.1396A>C | LVNC | Absent | 30471092 | Richard (2019) Clin Genet 95:356 |
| Ala472Gly | c.1415C>G | LVNC | 4.42 x 10-5 | 28798025 | Miszalski-Jamka (2017) Circ Cardiovasc Genet 10:e001763 |
| Ala476Pro | c.1426G>C | HCM | Absent | 34598319 | Filatova (2021) Mol Genet Genomic Med 9: |
| Glu485Lys | c.1453G>A | HCM | 5.35 x 10-5 | 27532257 | Walsh (2017) Genet Med 19:192 |
| Ala486Gly | c.1457C>G | HCM | Absent | 27532257 | Walsh (2017) Genet Med 19:192 |
| Ile547Thr | c.1640T>C | DCM | 4.99 x 10-5 | 28333919 | Bagnall (2017) Genet Med 19:1127 |
| Pro611Thr | c.1831C>A | DCM | Absent | 19881492 | Hassel (2009) Nat Med 15:1281 |
| Arg633Lys | c.1898G>A | DCM | 8.07 x 10-6 | 31983221 | Mazzarotto (2020) Circulation 141:387 |
| Pro646Gln | c.1937C>A | HCM | Absent | 27532257 | Walsh (2017) Genet Med 19:192 |
| Tyr652Cys | c.1955A>G | DCM | 7.86 x 10-5 | 19881492 | Hassel (2009) Nat Med 15:1281 |
| Thr666Ala | c.1996A>G | DCM | 3.22 x 10-5 | 27532257 | Walsh (2017) Genet Med 19:192 |
| Ile671Thr | c.2012T>C | LVNC | 2.87 x 10-5 | 30471092 | Richard (2019) Clin Genet 95:356 |
| Ser673Asn | c.2018G>A | LVNC | Absent | 28798025 | Miszalski-Jamka (2017) Circ Cardiovasc Genet 10:e001763 |

**Supplementary Table 9: *DES* missense variants reported in different types of cardiomyopathies**

Abbreviations: DCM, dilated cardiomyopathy; HCM, hypertrophic cardiomyopathy; LVNC, left ventricular noncompaction; RCM, restrictive cardiomyopathy; ACM, arrhythmogenic cardiomyopathy; DRM, desmin-related cardiomyopathy *variants with a Minor Allele Frequency (MAF) > 1 x 10−4. MAF retrieved from the Genome Aggregation Database (gnomAD).

| **Desmin Missense Variants** | **Nucleotide Change** | **Disease-associated** | **MAF on GnomAD** | **Pubmed ID** | **Reference** |
| --- | --- | --- | --- | --- | --- |
| Phe24Leu | c.72C>A | ACM | Absent | 27532257 | Walsh (2017) Genet Med 19:192 |
| Ser28Phe | c.83C>T | DCM | Absent | 34011823 | Nguyen (2021) Circ J epub:epub |
| Lys43Glu | c.127A>G | DCM | Absent | 27532257 | Walsh (2017) Genet Med 19:192 |
| Gly65Ser | c.193G>A | DCM | 2.42 x 10-5 | 27532257 | Walsh (2017) Genet Med 19:192 |
| Leu69Pro | c.206T>C | LVNC | 1.04 x 10-5 | 28798025 | Miszalski-Jamka (2017) Circ Cardiovasc Genet 10:e001763 |
| Glu108Lys | c.322G>A | DCM | Absent | 17325244 | Taylor (2007) Circulation 115:1244 |
| Leu115Ile | c.343C>A | DCM | Absent | 29892087 | Horvat (2019) Genet Med 21:133 |
| Asn116Ser | c.347A>G | ACM | Absent | 20829228 | Klauke (2010) Hum Mol Genet 19:4595 |
| Tyr122Cys | c.365A>G | ACM | Absent | 27532257 | Walsh (2017) Genet Med 19:192 |
| Tyr122His | c.364T>C | RCM | Absent | 31718026 | Brodehl (2019) Genes (Basel) 10:918 |
| Val126Leu | c.376G>T | DCM | Absent | 25163546 | Haas (2015) Eur Heart J 36:1123 |
| Leu136His | c.407T>A | DCM | 7.04 x 10-5 | 26265630 | Wilson (2015) Circ Res 117:603 |
| Leu136Pro | c.407T>C | DCM | Absent | 26724190 | Brodehl (2015) J Mol Cell Cardiol 91:207 |
| Glu139Gln | c.415G>C | DCM | 5.57 x 10-6 | 31514951 | Gigli (2019) J Am Coll Cardiol 74:1480 |
| Arg150Pro | c.449G>C | DCM | Absent | 27532257 | Walsh (2017) Genet Med 19:192 |
| Lys201Asn | c.603G>C | DCM | 7.07 x 10-6 | 28416588 | Dal Ferro (2017) Heart 103:1704 |
| **Arg212Gln* | *c.635G>A* | *LVNC* | *2.19 x 10-4* | *28798025* | *Miszalski-Jamka (2017) Circ Cardiovasc Genet 10:e001763* |
| Thr219Pro | c.655A>C | HCM | Absent | 29167554 | Harada (2018) J Hum Genet 63:249 |
| **Arg222His* | *c.665G>A* | *DCM* | *4.00 x 10-4* | *28416588* | *Dal Ferro (2017) Heart 103:1704* |
| Arg227Cys | c.679C>T | DCM | 7.95 x 10-6 | 28171858 | Yu (2017) Cardiology 137:78 |
| Leu232Phe | c.694C>T | DCM | 1.59 x 10-5 | 31983221 | Mazzarotto (2020) Circulation 141:387 |
| Glu234Lys | c.700G>A | HCM | Absent | 28427417 | Chen (2017) J Transl Med 15:78 |
| Val242Glu | c.725T>A | DCM | Absent | 32880476 | Verdonschot (2020) Circ Genom Precis Med 13:476 |
| Arg275Gly | c.823A>G | DCM | Absent | 25163546 | Haas (2015) Eur Heart J 36:1123 |
| Arg278Trp | c.832C>T | DCM | 3.99 x 10-6 | 27532257 | Walsh (2017) Genet Med 19:192 |
| Ala285Val | c.854C>T | DCM | Absent | 23300193 | Tse (2013) Hum Mol Genet 22:1395 |
| Ser290Tyr | c.869C>A | DCM | Absent | 31983221 | Mazzarotto (2020) Circulation 141:387 |
| Tyr296Cys | c.887A>G | DCM | Absent | 32041989 | Zhang (2020) Sci Rep 10:2226 |
| Ser298Leu | c.893C>T | DCM | 8.14 x 10-5 | 17325244 | Taylor (2007) Circulation 115:1244 |
| **Asp312Asn* | *c.934G>A* | *DCM* | *1.91 x 10-4* | *17325244* | *Taylor (2007) Circulation 115:1244* |
| Tyr331Asn | c.991T>A | ACM | Absent | 27532257 | Walsh (2017) Genet Med 19:192 |
| Gly340Asp | c.1019G>A | DCM | Absent | 27532257 | Walsh (2017) Genet Med 19:192 |
| Arg350Trp | c.1048C>T | DCM | 2.39 x 10-5 | 17325244 | Taylor (2007) Circulation 115:1244 |
| Ala360Ser | c.1078G>T | LVNC | Absent | 28798025 | Miszalski-Jamka (2017) Circ Cardiovasc Genet 10:e001763 |
| Asp365Glu | c.1095C>A | HCM | Absent | 33297573 | Micheu (2020) Diagnostics (Basel) 10:1061 |
| Arg375Trp | c.1123C>T | DCM | 4.24 x 10-5 | 30847666 | van Lint (2019) Neth Heart J 27:304 |
| Arg386His | c.1157G>A | DCM | 3.98 x 10-6 | 26458567 | Zhao (2015) Int J Mol Med 36:1479 |
| Leu398Pro | c.1193T>C | LVNC | 3.98 x 10-6 | 29447731 | van Waning (2018) J Am Coll Cardiol 71:711 |
| Glu401Asp | c.1203G>C | ACM | Absent | 29212896 | Bermúdez-Jiménez (2017) Circulation 137:1595 |
| Glu401Gly | c.1202A>G | DCM | Absent | 30847666 | van Lint (2019) Neth Heart J 27:304 |
| Ile402Thr | c.1205T>C | DCM | Absent | 33373648 | Fischer (2021) Int J Cardiol 329:167 |
| Ala403Val | c.1208C>T | ACM | Absent | 33232181 | Costa (2021) Circ Genom Precis Med 14:e003047 |
| Arg406Trp | c.1216C>T | DRM | Absent | 11352891 | Wang (2001) Circulation 103(19):2402-7 |
| Leu408Val | c.1222C>G | LVNC | Absent | 29447731 | van Waning (2018) J Am Coll Cardiol 71:711 |
| Glu410Lys | c.1228G>A | ACM | Absent | 33373648 | Fischer (2021) Int J Cardiol 329:167 |
| Glu413Lys | c.1237G>A | RCM | Absent | 16890305 | Pruszczyk (2007) Int J Cardiol 117:244 |
| Arg429Gln | c.1286G>A | ACM | 5.17 x 10-5 | 32397162 | Limongelli (2020) Genes (Basel) 11: |
| Arg436Ser | c.1308G>C | DCM | 6.38 x 10-5 | 32880476 | Verdonschot (2020) Circ Genom Precis Med 13:476 |
| Ile451Met | c.1353C>G | DCM | 6.45 x 10-5 | 10430757 | Li (1999) Circulation 100:461 |
| Thr453Ile | c.1358C>T | RCM | Absent | 16376610 | Arbustini (2006) Eur J Heart Fail 8:477 |
| Arg454Gln | c.1361G>A | DCM | 1.28 x 10-5 | 25163546 | Haas (2015) Eur Heart J 36:1123 |
| Gly456Arg | c.1366G>A | HCM | Absent | 32150461 | Hoss (2020) Circ Genom Precis Med 13: |
| *Val459Ile* | *c.1375G>A* | *DCM* | *3.18 x 10-3* | *17325244* | *Taylor (2007) Circulation 115:1244* |
| Val469Met | c.1405G>A | HCM | Absent | 16585054 | Muntoni (2006) Brain 129:1260 |

**Supplementary Table 10: *OBSCN* missense variants reported in different types of cardiomyopathies**

Abbreviations: DCM, dilated cardiomyopathy; HCM, hypertrophic cardiomyopathy; ACM, arrhythmogenic cardiomyopathy; MAF: Minor Allelic Frequency.

| **Obscurin Missense Variants** | **Nucleotide Change** | **Disease-associated** | **MAF on GnomAD** | **Pubmed ID** | **Reference** |
| --- | --- | --- | --- | --- | --- |
| Glu963Lys | c.2887G>A | DCM | Absent | 26406308 | Marston (2015) PLoS One 10:e0138568 |
| Arg1221Gln | c.3662G>A | HCM | 7.12 x 10-5 | 33658040 | Chung (2021) J Cardiovasc Magn Reson 23:18 |
| Pro2014Gln | c.6041C>A | HCM | Absent | 33658040 | Chung (2021) J Cardiovasc Magn Reson 23:18 |
| Val2161Asp | c.6482T>A | DCM | Absent | 26406308 | Marston (2015) PLoS One 10:e0138568 |
| Phe2809Val | c.8425T>G | DCM | Absent | 26406308 | Marston (2015) PLoS One 10:e0138568 |
| Pro3742Leu | c.11225C>T | HCM | Absent | 33658040 | Chung (2021) J Cardiovasc Magn Reson 23:18 |
| Asp4226Tyr | c.12676G>T | HCM | Absent | 33658040 | Chung (2021) J Cardiovasc Magn Reson 23:18 |
| Gly4287Val | c.12860G>T | DCM | Absent | 32746448 | Burstein (2021) Pediatr Res 89:1470 |
| Arg4344Gln | c.13031G>A | HCM | Absent | 17716621 | Arimura (2007) Biochem Biophys Res Commun 362:281 |
| Ala4484Thr | c.13450G>A | HCM | Absent | 17716621 | Arimura (2007) Biochem Biophys Res Commun 362:281 |
| Arg4856His | c.14582G>A | DCM | Absent | 26406308 | Marston (2015) PLoS One 10:e0138568 |
| Val5196Ile | c.15586G>A | HCM | Absent | 33658040 | Chung (2021) J Cardiovasc Magn Reson 23:18 |
| Arg5215His | c.15644G>A | HCM | Absent | 26573135 | Xu (2015) Sci Rep 17;5:16609 |
| Thr5569Ile | c.16706C>T | HCM | Absent | 33658040 | Chung (2021) J Cardiovasc Magn Reson 23:18 |
| Asp5762Asn | c.17284G>A | HCM | Absent | 33658040 | Chung (2021) J Cardiovasc Magn Reson 23:18 |
| Ala5791Pro | c.17371G>C | ACM | Absent | 28750076 | Forleo (2017) PLoS One 12:e0181842 |
| Arg5852Gln | c.17555G>A | HCM | Absent | 33658040 | Chung (2021) J Cardiovasc Magn Reson 23:18 |
| Asp5966Asn | c.17896G>A | DCM | Absent | 26406308 | Marston (2015) PLoS One 10:e0138568 |
| Gly7500Arg | c.22498G>C | HCM | Absent | 26573135 | Xu (2015) Sci Rep 17;5:16609 |
